# Following the Sun: a Mathematical Analysis of the Tracks of Clock-shifted Homing Pigeons

Ingo Schiffner<sup>a,b\*</sup>, Bettina Siegmund<sup>a</sup> and Roswitha Wiltschko<sup>a</sup>

<sup>a</sup>Fachbereich Biowissenschaften, Goethe-Universität Frankfurt, Siesmayerstr. 70,  
 D-60054 Frankfurt am Main, Germany

<sup>b</sup>Queensland Brain Institute, University of Queensland, Building #79, St. Lucia,  
 Qld 4072, Australia

\*Corresponding author: I. Schiffner,  
 e-mail: i.schiffner@uq.edu.au

## Summary

We analyse the tracks of clock-shifted pigeons from six releases to determine how pigeons cope with the conflict between their sun compass and the other navigational cues. Time-lag embedding is used to calculate the short-term correlation dimension, a parameter that reflects the complexity of the navigational system and with it, the number of factors involved. In the beginning, while pigeons are still at the release site, the short-term correlation dimension is low; it increases as the birds leave the site, indicating the birds are now actively navigating. Clock-shifted pigeons show more scatter than the control birds, and their short-term correlation dimension becomes significantly smaller than that of the controls, remaining lower until the experimental birds reach their loft. This difference is small, but consistent and suggests a different rating and ranking of the navigational cues. Clock-shifted pigeons do not seem to simply ignore the information from their manipulated sun compass altogether, but appear to merely downgrade it in favour of other cues, like their magnetic compass. This is supported by observation that the final part of the tracks still shows a small deviation into the expected direction, indicating an effect of clock-shifting until the end of the homing flight.

Supplementary material is available

Key words: navigation, sun compass, clock-shift, points of decision, correlation dimension, homing pigeons

## INTRODUCTION

The use of the sun as a compass in birds was first described in 1950 by Kramer (1950) for the starling  
 40 *Sturnus vulgaris* L.; at the same time, von Frisch (1950) described sun compass use in honeybees,  
*Apis mellifera* L.. These pioneering studies were soon followed by many more, revealing that sun  
 compass orientation is a widespread phenomenon in the animal kingdom. The method of choice for  
 demonstrating sun compass orientation was to alter the animal's perception of time by shifting their  
 internal clock either forward (fast shift) or backward (slow shift), mostly for 6 h – by this, the animals  
 45 misjudge the time of the day and, as a consequence, the position of the sun. The resulting deflection  
 from the headings of untreated controls serves as an indicator for sun compass use.

In 1958, Schmidt-Koenig performed the first such 'clock-shift'-experiments with homing pigeons,  
*Columba livia* L. f. *domestica* (Schmidt-Koenig, 1958). Meanwhile, the sun compass has been  
 50 demonstrated to be a very important component of the avian navigational system. Pigeons have been  
 shown to use the sun compass not only at distant, unfamiliar sites (e.g. Schmidt-Koenig, 1961,  
 Keeton, 1973), but also in the vicinity of their loft to translate the course indicated by their navigational  
 map or their mosaic map of familiar landmarks into a flying direction (e.g. Graue, 1963; Schmidt-  
 Koenig, 1979; Biro et al., 2007). Being established by experience (Wiltschko, 1983), the sun compass  
 55 is well tuned to the local sun's arc in the pigeons' home region, with the birds adapting their  
 compensation of the sun's movements to the different rates of change in sun azimuth in the course of  
 day (Wiltschko et al., 2000).

A study on the significance of the sun compass showed that young, inexperienced pigeons rely on this  
 60 mechanism most strongly, showing the full deflection from untreated controls based on the difference  
 in sun azimuth between the bird's subjective time and the true time of day. When pigeons grow older  
 and get more experienced, however, the deflection decreased, with great scatter, to about 50% in  
 birds aged 2 years and older (Wiltschko et al., 1994). The observation that the deflections were  
 significantly larger in pigeons carrying magnets suggests that old pigeons fly a compromise between  
 65 the directions indicated by their sun compass and their magnetic compass (Wiltschko and Wiltschko,  
 2001).

In the present study, we analyse how clock-shifting affects the navigational processes itself, using an  
 interdisciplinary approach. With the help of a recently described method derived from dynamic  
 70 systems theory, we used time lag embedding to determine the *short-term correlation dimension* (for an  
 introduction into dynamic systems theory, see Kaplan and Glass 1995 and Kantz and Schreiber 1997).  
 This parameter allows us to assess the complexity of the system, indicating its degrees of freedom –  
 the method has been rigorously tested in mathematical systems where the exact number of degrees  
 of freedom is known (see Grassberger and Proccacia 1983). In our specific case, the correlation  
 75 dimension reflects the number of factors involved in the navigational process (for details, see  
 Appendix and Schiffner et al., 2011). By shifting the pigeons' internal clock, we experimentally cause  
 the two compass systems to give conflicting information – that of the magnetic compass being correct,  
 that of the sun compass being misleading. Also, there may be a conflict between the sun compass

and other local navigational factors used, because, as the birds progress, these factors do not change as expected. How do birds cope with this situation? If they completely ignore the misleading information from their sun compass, this should lead to a marked decrease in short-term correlation dimension.

## RESULTS

The number of track is given in Table 1 (We will make the data available to anyone interested upon request). Figure 1 gives, as an example, the tracks from the site BD, 17.3 km northeast of the Frankfurt loft; Fig. 2 gives the same tracks, now shaded differently to indicate the short-term correlation dimension. For the tracks of the other releases, see Supplementary Figures S1a-e and Fig. S2a-e.

### Traditional analysis

For this analysis, we subdivided the tracks in several phases according to the Points of Decision (see Schiffner and Wiltschko 2009; Schiffner et al. 2003) into an initial phase, a departure phase and a final homing phase, the latter ending when the pigeon reaches the loft. The data of the traditional analysis from the 6 releases are given in Table S1 in the Supplementary Material. In general, there is a considerable amount of variability and sometimes some seemingly erratic behaviour, so no consistent pattern emerges. Most of the significant differences are found in the tracks from BD, the site most familiar to the pigeons.

Table 2 gives the second order comparison. The number of Points of Decision increased significantly in the clock-shifted birds, suggesting a greater necessity to reorient. The difference in the efficiency of the complete tracks does not reach significance; it must be considered, however, that only about two thirds of the clock-shifted pigeons reached the loft during the time when the battery was still active (see  $n_n$  in Table S1) – the other tracks ended somewhere in the region, often at a considerable distance from home. In these cases, the true efficiency of the route home was certainly considerably lower, but because the last part of the tracks was not recorded, it cannot not be determined. The same applies for the number of Points of Decision. In this respect, Table 2 does not reflect the behaviour of the clock-shifted pigeons realistically. Altogether, 19 of 54 (35 %) experimental birds did not return in time, compared to 11 of 59 (19%) control birds, but 10 of the experimental pigeons arrived later on the day of release.

During the various phases of the homing flight, we find only few significant differences between clock-shifted pigeons and controls (see Table 2). In the initial phase, while the birds are still at the release site, the behaviour of the two groups is similar. Clock-shifted pigeons have shorter vectors during the departure phase, indicating more scattered, individual headings. The mean headings with respect to home are not significantly different during the initial and the departure phase, although there are considerable deviations between the mean vectors, mostly in the expected counterclockwise direction (see Table 2 and Table S1); they differ significantly, however, during the final homing phase.

120

### Changes in the short-term correlation dimension

125

The mean short-term correlation dimensions for the six releases and their means are shown in Fig. 3. Numerical data are given in Table 3, separating the first 2000 m, after which the correlation dimension strongly increases, from the central part of the track and from the last 2000 m. A wide range of scatter is observed, between birds and, to some extent, also between releases and/or sites. However, common trends become visible: the short-term correlation dimension increases significantly with distance<sup>1</sup>, and we find a significantly lower short-term correlation dimension in the clock-shifted pigeons for all but the closest site BH (ANOVA: BD:  $p < 0.05$ ; other sites:  $p < 0.001$ ; see Table S2 in the Supplementary Material), indicating an effect of clock-shifting.

130

135

The reduction is rather small, only of the order of  $\frac{1}{4}$  degrees of freedom, but it is persistent throughout the entire journey. It becomes more pronounced en route as the pigeons proceed. Looking at the beginning, the central part and the end of the track separately, a second order analysis reveals no significant difference between clock-shifted pigeons and control birds within the first 2000 m ( $T = 5$ ,  $p > 0.05$ , Wilcoxon test), whereas in the later parts of the tracks, when the pigeons are en route navigating home, the short-term correlation dimensions differ significantly ( $T = 0$  and  $T = 1$ ,  $p < 0.05$ ).

## DISCUSSION

140

The observed decrease in the short-term correlation dimension clearly shows that the conflicting information produced by clock-shifting leads to subsequent changes in the complexity of the navigational processes. This is the first experimental evidence that the correlation dimension directly reflects changes in the navigational processes and suggests that the method described earlier (Schiffner et al. 2011) can be successfully applied to detect such changes.

145

### The initial phase of the homing flight

150

155

The decrease, however, does not seem to manifest itself at the very beginning of the homing flight, but only later, as the birds leave the site. Immediately after release, when pigeons still fly around in the vicinity of the release point, the mean short-term correlation dimensions are rather low, too low to indicate complex navigational processes (Schiffner et al., 2011). This is in agreement with the assumption that the initial phase itself plays little role with regard to making a navigational decision, but rather serves for preparing the flight, like gaining height and speed, and possibly also to explore the surroundings, as also suggested in earlier studies (Schiffner and Wiltschko, 2009; Schiffner et al., 2013). However, a first navigational process must take place already before the birds begin to fly, because, when released from a cage, pigeons show a tendency to leave in the direction in which they later vanish (Chelazzi and Pardi, 1972; Kowalski, 1994; Mazzotto et al., 1999). This means that the

<sup>1</sup> A certain increase in short-term correlation dimension as the pigeons approach home has been described before; it appears to reflect an additional use of familiar landmarks in the vicinity of their loft (Schiffner et al., 2011).

birds have roughly determined their home course; to what extent they already have used a compass to transform this course in a flying direction (Kramer, 1957), is not entirely clear. The observation that the deflection in clock-shift experiments increased from the first minute until the pigeons vanished from sight (e.g. Schmidt-Koenig, 1965; Wiltschko et al., 1994) appears to suggest that at least consulting the sun compass may occur only when the bird is already airborne, possibly only after it decided to leave the release site.

The traditional variables also appear to speak against navigation immediately after release: the duration of the initial phase until the 1st Point of Decision, its distance from the release point and the other variables do not differ between the two groups of birds. There is no indication that pigeons realise that something is unusual and hesitate to leave the site when under the influence of a clock-shift. Taken together, this suggests that during the initial phase, pigeons are not yet concerned with navigating (for discussion, see Schiffner et al., 2011), and therefore clock-shifting appears to have little effect on the behaviour during this phase. Only at BD, the site our pigeons knew from several previous homing flights, we found a significant deflection of the experimental birds from the controls, not only in the initial phase, but throughout the homing flight. Obviously, familiarity with the site and the route home does not diminish the effect of clock-shifting here.

### **Navigating to the loft**

After the initial phase, the short-term correlation dimension of the clock-shifted pigeons is consistently lower than that of the control birds, indicating changes in the navigational processes. This allows some careful conclusions on the strategy how pigeons overcome the problem of their manipulated internal clock: it seems that realizing that their sun compass is amiss, they do not simply ignore its false information altogether and switch to their magnetic compass. Instead, they appear to continue using sun compass information, yet downgrade it, probably in favour of the magnetic compass. This is suggested by the only small decrease in short-term correlation dimension observed in the clock-shifted pigeons - had the sun compass been dropped altogether, we would have expected a somewhat larger decrease (see Schiffner et al., 2011). It seems that clock-shifted pigeons gradually increase the weighting of their magnetic compass, but never fully ignore the information provided by the sun. The higher number of points of decision observed in the clock-shifted birds suggests that they do indeed correct their mistake and adjust their course during the homing flight, but then are again misled by their manipulated sun compass. The deviation from the home course continues to become smaller, but it does not disappear completely. A small, but significant deflection between the two groups remains, and the short-term correlation dimension continuous to be a little lower in the experimental birds. This clearly shows that some effect of clock-shifting on the navigational processes persists until the pigeons reach their loft. This is in accordance with the observations by Gagliardo et al. (2009) and Filannini et al. (2013) who also tracked clock-shifted pigeons with GPS-based recorders and found that the effect of the treatment usually decreased as the birds approached their loft, but was still evident when they reached home.

About two thirds of our clock-shifted pigeons returned within the about 3 h life-time of the battery. This was well before their subjective day ended, and hence they had not experienced the situation that the sun was still out when they expected it to have already set. It is unclear what the remaining birds did after the beginning of their subjective night, because their behaviour was no longer recorded.

Gagliardo et al. (2009) reported that their clock-shifted pigeons made a stop when their subjective day ended. The great majority of these birds, however, re-started their flight later on the same day. It seems possible that our pigeons behaved in a similar way. About half of the late birds arrived in the afternoon of the day of release, that is, before a sunset and sunrise could have reset the internal clock. They probably relied on their magnetic compass. An important role of the magnetic compass in overcoming clock-shift effects is supported by observations of Gagliardo and colleagues (Gagliardo et al., 2009): their experimental birds with magnets showed larger deviations and had more problems to reorient than otherwise un-manipulated clock-shifted pigeons, and more of them got lost. Also, while the pigeon carrying magnets went in random directions when they restarted, the otherwise un-manipulated clock-shifted birds were homeward oriented.

A remarkable observation in our study is the great variability in the behaviour of the experimental birds. Both groups showed a considerable amount of scatter, but the variance among the clock-shifted pigeons is markedly greater, which is in agreement with observations by our Italian colleagues (Bonadona et al., 2000; Gagliardo et al., 2009; Filannino et al., 2013) who also describe a great variability in the responses of clock-shifted pigeons. Evidently, pigeons respond highly individually and have rather different ways to handle the cue-conflict situation caused by their shifted internal clock.

## MATERIAL AND METHODS

The study is based on six releases with pigeons whose internal clock was shifted 6 h fast, performed during the summer months of the years 2001 and 2002 (for the exact dates, see Table 1). The releases were performed in the early morning during the overlap between the pigeons' shifted and the natural day, in sunny weather with no or little wind.

### Experimental pigeons

The test birds were experienced pigeons from our Frankfurt loft (50°08' N, 8°40' E), all older than 2 years. In their first year of life, they had participated in a standard training program of flock releases up to 40 km in the cardinal compass directions. Their experience additionally included a number of single homing flights returning from previous homing experiments, the number of which increased with increasing age.

Clock-shifting followed standard procedures: the experimental birds were confined in light-tight rooms under a shifted photoperiod that began 6 h before sunrise and ended 6 h before sunset for at least 5 days. This induces a counterclockwise deflection of their bearings from the untreated controls. The control birds were kept in a photoperiod synchronous with the natural day.

### Release sites

The five release sites used in this study - between 8.4 km and 21.5 km from the loft lie in the general region familiar to the birds from training and previous homing flights; their positions are given in Table 1. The site BD was very familiar (vfs) to the test birds as they had homed 11 times from there in the previous year (see Schiffner et al., 2013). The sites RB, BH, OT and WAL, in contrast, were unfamiliar to the birds (ufs) in the sense that they had not started a homing flight from there before. In WAL, we performed a second release with the same birds now familiar with the site (fs) three weeks after the first, this time switching the treatments so that the former controls were now 6 h shifted fast and vice versa (see Table 1 for details).

### GPS tracking devices and release performance

The GPS tracking devices used were based on the prototype developed by von Hünenbein et al. (2000). The recorders were equipped with an embedded patch antenna, a data logger and a 3.3 V CR 2-battery with a life time of about 3 h (for details, see Wiltchko et al., 2007). All recorders were set to take a positional fix every second, achieving a precision of  $\pm 4$  m.

The pigeons were transported to the release sites in wooden cages in a VW bus and kept without direct view of the sun in the shade of the vehicle while awaiting their release. Immediately before release of a bird, the recorder was equipped with the battery and wrapped in plastic to shield it from water. This package was attached to the pigeon's back by means of a harness made from Teflon tape. The birds were wearing this harness continuously during the summer months; the recorder was placed on the dorsal plate and fixed with Velcro and additional sticky tape. The weight of the recorder including the battery was 35 g; harness and coating added another 7 g to the load. In total, the package was between 5.5% and 9% of the pigeons' weight. Each bird was released singly, alternating between experimental and control birds.

The number of tracks recorded from each site is included in Table 1. Although we always made sure that the GPS receiver had contact with a sufficient number of satellites and was properly working before it was wrapped in the plastic coating, technical problems like temporary satellite loss, battery failure, etc., but also late returns after the battery had run empty led to a number of incomplete tracks (see Table 1).

### Data analysis

For the system analysis, we calculated short-term correlation dimensions for the tracks by means of time lag embedding (a brief summary of the procedure is given in the Appendix; for details, see Schiffner et al., 2011). In contrast to the true correlation dimension of a track based on all data points, it was calculated as sliding mean over 180 seconds and averaged for each 500 m step from the release site. This short-term correlation dimension is lower than the true correlation dimension of the entire track, but can be used for comparisons.



To indicate the short-term correlation dimension numerically, we determined separately its mean for the first 2000 m for all pigeons with at least three data points, the mean of the central part of the track for all pigeons with at least 5 data points, and the mean of the last 2000 m. The mean of these means is given for each release.

We also performed a traditional analysis based on the division of the tracks into distinctive phases by Points of Decisions which are based on the temporal course of the cumulative velocity and momentary steadiness (a brief summary of the procedure to determine Points of Decision is given in the Appendix;; for a detailed description, see Schiffner and Wiltschko, 2009 and Schiffner et al., 2013). Points of Decision divide the tracks into an *initial phase*, ending with the first Points of Decision, the subsequent *departure phase*, which is identical to the *final homing phase* leading to the loft if there is only one Point of Decision; otherwise, a separate final homing phase follows, with occasionally intermediate phases before the final homing phase begins.

For the entire track, we determined:

- (1) the number of Points of Decision
- (2) the overall efficiency of flight (the lengths of the track divided by the direct distance);

We also determined:

- (3) the duration of the initial phase till the first Point of Decision (in seconds),
- (4) the distance of the first Point of Decision from the release point (in meters) and, for the various phases,
- (5) mean headings with respect to the local home direction (i.e. the home direction from the pigeon's momentary position),
- (6) vector lengths resulting from these headings, reflecting the agreement among pigeons,
- (7) steadiness of the flight, calculated as mean vector length from all headings of a pigeons during the respective phase.

In cases with only one Point of Decision, we took the first 300 s of the final homing phase as a departure phase (see also Schiffner et al., 2013). Rarely occurring intermediate phases were not included in the analysis.

### Statistical analysis

The short-term correlation dimensions of the tracks were compared on the first order level for each site separately by a two way ANOVA with repeated measurements using a factorial design, with the independent factors being the experimental condition (i.e. control or clock-shift) and the distance from the release site at which the short-term correlation dimension estimates were taken. Each individual is treated as repeated measure of the same underlying navigational processes, which is normal in the controls and manipulated in the clock-shifted birds. When the ANOVA indicated significance, we used the Tukey HSD test to correct for multiple comparisons and look for differences between control and clock-shifted pigeons.



In the traditional analysis, we tested the circular data from control pigeons and those from clock-shifted pigeons for each phase of each release with Rayleigh test and compared them with the Watson Williams test (if both  $r > 0.65$ ) or the Mardia Watson Wheeler test (Batschelet 1981); the other data were compared with the Mann Whitney U-test. For the second order analysis, we calculated means for the following variables: 'number of Points of Decision', 'deviation of the headings from the home direction', and 'vector lengths', and medians for the variables 'duration of the initial phase', 'distance of the 1<sup>st</sup> Point of Decision from the release point', 'overall efficiency' and 'steadiness of the tracks'. Here, data from untreated control birds and clock-shifted pigeons were compared using the Wilcoxon signed rank test. The data of the first 2000 m, of the departure phase and the final homing phase were separately compared using this test.

330

## APPENDIX

**Calculating the *short-term correlation dimension***

335

With respect to time lag embedding and calculation of the correlation dimension, our study is interdisciplinary, combining navigation research with dynamic systems theory; for background and general introduction into dynamic system theory, see e.g. Kaplan and Glass (1995) and Kantz and Schreiber (1997). The methods are well established and primarily used to describe physical / mechanical systems, but have been applied to biological systems before (for review, see Skinner, 1994).

340

According to Taken's (1981) embedding theorem, an extension of Whitney's (1936) theorem, a dynamic system can be fully reconstructed in phase space given a series of observations of the state of the dynamic system, i.e. a time-series. In phase space, every degree of freedom or parameter of the system is represented as an axis in a multidimensional space. The number of degrees of freedom is then the minimum number of variables necessary to fully describe the system. For mathematical systems, this is equivalent to the number of terms in the equation, in a physical / mechanical system, it is the number of inputs: e.g. in the case of a robot navigating in a given environment, the number of independent sensors necessary to perform the task. Here we assume that for a biological system like pigeon navigation, the correlation dimension, like in the case of the robot, represents the number of independent inputs necessary to navigate.

350

In our particular case, we are interested in the navigational process of the pigeon, with the time series provided by the tracks recorded during the homing flight. Using time lag embedding requires no a priori knowledge about the number of factors involved and their specific interactions; instead the methods used here allow us to create a physical model of the process using only the recorded data.

355

From this model we can then calculate several parameters. In the present study, we focus solely on the so-called *correlation dimension*, a value reflecting the system's degrees of freedom, i.e. in this particular case the number of factors involved in the navigational process. The calculation, with some minor enhancements, as listed below, was based on the original algorithm proposed by Grassberger and Procaccia (1983).

360

1. In order to ensure *optimal embedding*, we determined the embedding lag for each individual time series. We used the first minimum of the mutual information to determine an appropriate embedding lag (Fraser and Swinney 1986)] and a fixed range of embedding dimensions - from 3 to 5 - in order to avoid spurious effects from using different embeddings. For the calculation of the *mutual information* we decided to implement a new non-parametric approach in order to circumvent problems with unevenly distributed data. To ascertain that data were always evenly distributed we divided the data into  $\log_2 N$  (with N being the number of data points in the time series) partitions and assigned a fixed number of elements to each partition. This new approach allowed us to get much better convergence and well defined minima and maxima.

365

2. In addition we implemented an algorithm for *automatic selection of a proper scaling region*, thus ensuring that all values would be selected on objective criteria. This was achieved by embedding the time series three times, with successively increasing embedding dimensions. We then choose the scaling region defined by the minimum in standard deviation over all three embeddings. As the standard deviation tends to decrease as we approach the size of the attractor, the so called depopulation region, we added some restrictions:
- The first minimum in standard deviation was used to define an initial estimate; other potential scaling regions with lower standard deviation were ignored, if the resulting correlation dimension would fall below this initial estimate ( $\pm$  standard deviation).
  - The size of the scaling region was fixed to 1/4 of the length of the attractor. Although the latter restriction seems to be a rather coarse solution, it ensures that the scaling region will never lie within the depopulation region and allow for better comparison of estimates from different time series.

In order to observe changes in the correlation dimension in the course of the homing flight, we determined *short-term correlation dimensions* for the tracks. In contrast to the true correlation dimension based on all data points, they were calculated as sliding means over 180 seconds and averaged for each 500 m step from the release site. This short-term correlation dimension is lower than the true correlation dimension of the entire track, but can be used for comparisons (for details, see Schiffner et al., 2011).

### Determining Points of Decision

Points of Decision are determined with the help of two variables, *cumulative velocity* and *momentary steadiness*, and their changes with time. *Cumulative velocity* is defined as the current distance of a pigeon from the release point divided by the time that passed since release - it increases if a pigeon moves away from the release point and decreases if a pigeons slows down, flies perpendicular, heads back etc. *Momentary steadiness* is calculated as sliding means of the vector length of 60 consecutive headings determined every 15 seconds; it approaches 1, if the bird flies straight, has lower values if a birds changes course and would become 0 if a bird flies in circles.

A Point of Decision was originally defined by the highest increase in the steadiness of flight immediately preceding or during an increase of cumulative velocity when the pigeon departed from the release site. Hence this definition is independent of the bird's heading when it leaves the release point on a steady course. Frequently, pigeons fly around at the release site and are in the opposite semicircle of the direction in which they are going to leave. In this case, the cumulative velocity first decreases approaching zero, then increases rapidly - here, the highest increase in steadiness preceding the increase in cumulative velocity marks the Point of Decision (for details see Schiffner and Wiltchko, 2009).

Over longer distances, most tracks include periods where the pigeons fly steadily towards home and others where they stall and do not increase the distance from the release point continuously. Hence

the temporal course of the cumulative velocity shows periods of increase and periods of decrease of varying length. To take this into account, sliding means of the cumulative velocity over 60 seconds are calculated every 15 seconds, and the value of each of these steps is compared with the preceding one. There are three different types of steps, namely steps with increasing cumulative velocity, steps with decreasing cumulative velocity and steps of no change in cumulative velocity. A period is defined as consisting of at least 5 steps of the same type, which means that the pigeon e.g. was either increasing or decreasing its cumulative velocity over more than 60 seconds. In order to be able to define periods even when the cumulative velocity is very low, yet shows an overall trend, these five steps can be interrupted by steps with no change in cumulative velocity (Schiffner et al., 2011, 2013).

Increasing cumulative velocity is normally associated with an increase in momentary steadiness as defined above (Schiffner and Wiltshko, 2009). A Point of Decision is indicated by the highest increase in steadiness between two consecutive steadiness values 15 s apart within the period showing the highest mean increase of steadiness over 60 s (5 means). This way, we define additional Points of Decisions by the highest increase of the momentary steadiness following periods where the cumulative velocity remained constant or decreased (see also Schiffner et al., 2011).

#### **Data from the various phases of the individual releases**

Supplementary Table S1 gives the mean respective medians of variables from the initial phases, the departure phase and the final homing phase of the six individual releases.

#### **ANOVA statistics of the short-term correlation dimension**

Supplementary Table S2 gives details on the two-way ANOVA for the short-term correlation dimensions calculated as a sliding mean and averaged for each 500 m segment relative to the home loft for each release.

#### **Figures of the tracks**

Supplementary Fig. S1 gives the tracks from the releases RB, BH, OT, WAL1 and WAL2;

Supplementary Fig. S2 gives the same tracks with the short-term correlation dimension indicated.

#### **ACKNOWLEDGEMENTS**

Our work was supported by the Deutsche Forschungsgemeinschaft (grants to RW). We sincerely thank O. Henseler, D. Pferdenges, F. Sicks, K. Stapput, D. Szymanski, P. Thalau and D. Zeller for their valuable help with conducting the releases. The experiments were performed according to the rules and regulations of animal protection in Germany.

#### **FUNDING**

Our work was supported by the Deutsche Forschungsgemeinschaft (grants Wi 988/6-1 and Wi 988/6-2 to R.W.)

## AUTHOR CONTRIBUTIONS

B.S. and R.W. conceived and designed the study; B.S. performed the releases, I.S. analysed the data; I.S and R.W. wrote the manuscript.

## COMPETING INTERESTS

The authors declare that they have no conflict of interest.

## REFERENCES

- Batschelet, E.** (1981). *Circular Statistics in Biology*. Academic Press, London, New York
- Biro, D., Freeman, R., Meade, J., Roberts, S. and Guilford, T.** (2007). Pigeons combine compass and landmark guidance in familiar route navigation. *Proc. Natl. Acad. Sci. USA* **104**, 7471-7476
- Chelazzi, G. and Pardi, L.** (1972). Experiments on the homing behavior of cage pigeons. *Monit. Zool. Ital. N S* **6**, 63-73
- Filannino, C., Armstrong, C., Guilford, T. and Gagliardo, A.** (2013). Individual strategies and release site features determine the extent of deviation in clock-shifted pigeons at familiar sites. *Anim. Cogn.* doi:10.1007/s10071-013-0635-x)
- Gagliardo, A., Savini, M., De Santis, A., Dell’Omo, G. and Ioalè, P.** (2009). Re-orientation in clock-shifted homing pigeons subjected to a magnetic disturbance: a study with GPS data loggers. *Behav. Ecol. Sociobiol.* **64**, 289–296
- Grassberger, P. and Procaccia, I.** (1983). Characterization of strange attractors. *Phys. Rev. Lett.* **50**, 346-349
- Graue, L.C.** (1963). The effect of phase shifts in the day-night cycle on pigeon homing at distances of less than one mile. *Ohio J Sciences* **63**, 214-217
- Kantz, H. and Schreiber, T.** (1997). *Nonlinear time series analysis*. Cambridge University Press, Cambridge
- Kaplan, D. and Glass, L.** (1995). *Understanding nonlinear dynamics*. Springer, New York
- Keeton, W.T.** (1973). Release-site bias as a possible guide to the "map" component in pigeon homing. *J. Comp. Physiol.* **86**, 1-16
- Kowalski, U.** (1994). Das Richtungsverhalten verfrachteter Brieftauben (*Columba livia*) im Orientierungskäfig. *J. Ornithol.* **135**, 17–35
- Kramer, G.** (1950). Weitere Faktoren, welche die Zugaktivität des gekäfigten Vogels orientieren. *Naturwissenschaften* **37**, 377-378
- Kramer, G.** (1957). Experiments on bird orientation and their interpretation. *Ibis* **99**, 196-227
- Mazzotto, M., Nacci, L. and Gagliardo, A.** (1999). Homeward orientation of pigeons confined in a circular arena. *Behav. Processes* **46**, 217-225
- Schiffner, I. and Wiltschko, R.** (2009). Point of decision: when do pigeons decide to head home? *Naturwissenschaften* **96**:251–258.
- Schiffner, I., Baumeister, J. and Wiltschko, R.** (2011). Mathematical analysis of the navigational process in homing pigeons. *J. Theor. Biol.* **291**, 42-46.

- Schiffner, I., Fuhrmann, P. and Wiltschko, R.** (2013). Homing flights of pigeons in the Frankfurt region: the effect of distance and local experience. *Anim. Behav.* **86**, 291-304
- 495 **Schmidt-Koenig, K.** (1958). Der Einfluß experimentell veränderter Zeitschätzung auf das Heimfindevermögen von Brieftauben. *Naturwissenschaften* **45**, 47
- Schmidt-Koenig, K.** (1961). Die Sonne als Kompaß in Heim-Orientierungssystem der Brieftauben. *Z. Tierpsychol.* **68**, 221–224
- Schmidt-Koenig, K.** (1965). Über den zeitlichen Ablauf der Anfangsorientierung bei Brieftauben. 500 *Verh. Dtsch. Zool. Ges. Kiel* **28**, 407-411
- Schmidt-Koenig, K.** (1979). *Avian Orientation and Navigation*. New York: Academic Press
- Skinner, J.E.** (1994). Low-dimensional chaos in biological systems. *Nature Biotechnology* **12**, 596-600
- Takens, F.** (1981). Detecting strange attractors in turbulence. In *Dynamical Systems and Turbulence*, 505 *Lecture Notes in Mathematics*, Vol. 898, pp. 366–381. Berlin: Springer
- von Frisch, K.** (1950). Die Sonne als Kompaß im Leben der Bienen. *Experientia* **6**, 210–221
- von Huenerbein, K., Hamann, H., Rüter, E. and Wiltschko, W.** (2000). A GPS-based system for recording the flight paths of birds. *Naturwissenschaften* **87**, 278–279
- Whitney, H.** (1936). Differentiable manifolds. *Ann Mathematics* **37**, 645-680
- 510 **Wiltschko, R.** (1983). The ontogeny of orientation in young pigeons. *Comp. Biochem. Physiol.* **76A**, 701-708
- Wiltschko, R. and Wiltschko, W.** (2001). Clock-shift experiments with homing pigeons: A compromise between solar and magnetic information? *Behav. Ecol. Sociobiol.* **49**, 393-400
- Wiltschko, R., Kumpfmüller, R., Muth, R. and Wiltschko, W.** (1994) Pigeon homing: The effect of 515 clock-shift is often smaller than predicted. *Behav Ecol Sociobiol* **35**, 63-73
- Wiltschko, R., Walker, M. and Wiltschko, W.** (2000). Sun-compass orientation in homing pigeons: compensation for different rates of change in azimuth? *J. Exp. Biol.* **203**, 889-894
- Wiltschko, R., Schiffner, I. and Siegmund, B.** (2007). Homing flights of pigeons over familiar terrain. 520 *Anim. Behav.* **74**, 1229-1240

To the figures:

525 Fig. 1 Tracks of pigeons released at BD, 17.3 km northeast of the loft, home direction 230°. The  
release site is marked by a black triangle, the home loft by the black square. Tracks of  
untreated control birds are given in *blue*, those of 6 h fast-shifted pigeons in *red*. Incomplete  
tracks ending in flight are marked with an open triangle, tracks lost seconds after landing  
(probably because the contact to the satellites was interrupted) with an open circle, and tracks  
530 lost after a longer period of sitting with an open square.

Fig. 2 The same tracks of pigeons released at BD as in Figure 1, with controls and clock-shifted  
pigeons given separately, indicating the short-term correlation dimension by the colour of the  
track, see map legend for details. The location of the release site is indicated in *blue* for the  
535 control birds and in *red* for the clock-shifted pigeons; the home loft is marked by a white dot

Fig. 3 Average short-term correlation dimension for all releases, with control birds indicated in blue  
and experimental birds in red. The thin lines indicate the means of the single releases, the  
thick lines give the average  
540



Table 1 List of releases, local experience of birds and number of tracks recorded

| Site | Home direction<br>and distance (km) |       | Dates of releases   | Expe-<br>rience | Controls |                |      | Clock-shifts |                |      |
|------|-------------------------------------|-------|---------------------|-----------------|----------|----------------|------|--------------|----------------|------|
|      |                                     |       |                     |                 | n        | n <sub>c</sub> | late | n            | n <sub>c</sub> | late |
| BD   | 230°                                | 17.3  | 12.6. + 17.7.2001   | vfs             | 10       | 9              | -    | 9            | 5              | 1    |
| RB   | 194°                                | 19.2  | 22.8.2001           | ufs             | 4        | 4              | -    | 6            | 3              | 3    |
| BH   | 167°                                | 8.4   | 18.+ 19.6.2002      | ufs             | 12       | 9              | 1    | 12           | 6              | 1    |
| OT   | 338°                                | 17.9  | 5.+ 8.7. 2002       | ufs             | 10       | 8              | 1    | 8            | 5              | 3    |
| WAL1 | 67°                                 | 21.5. | 7., 9. + 13.8. 2002 | ufs             | 13       | 8              | 2    | 10           | 3              | 7    |
| WAL2 | 67°                                 | 21.5. | 2. – 5. 9.2002.     | fs              | 10       | 4              | 5    | 9            | 4              | 4    |

Experience: vfs, very familiar with the site; ufs, unfamiliar with the site, being released there for the first time; fs, familiar with the site. The last columns give the number of tracks, n, that could be analysed; n<sub>c</sub> , number of complete tracks; late, number of pigeons that returned after the battery expired.

Table 2 Second order comparison between controls and clock-shifted pigeons (6 releases)

| Variable                       | Control | Clock-Shift | T   | Sig.? |
|--------------------------------|---------|-------------|-----|-------|
| <i>Complete Tracks</i>         |         |             |     |       |
| Number of Points of Decision   | 1.6     | 2.0         | 0   | *     |
| Efficiency                     | 0.87    | 0.85        | 3   | n.s   |
| <i>Initial Phase</i>           |         |             |     |       |
| Duration (in seconds)          | 150     | 161         | 5   | n.s.  |
| Distance to 1st PoD (in meter) | 1097    | 779         | 8   | n.s.  |
| $\Delta h$                     | - 10°   | - 51°       | 7.5 | n.s.  |
| Vector length r                | 0.68    | 0.69        | 8   | n.s.  |
| Steadiness                     | 0.29    | 0.30        | 5.5 | n.s.  |
| <i>Departure Phase</i>         |         |             |     |       |
| $\Delta h$                     | 0°      | - 20°       | 5   | n.s.  |
| Vector length r                | 0.82    | 0.61        | 1   | *     |
| Steadiness                     | 0.84    | 0.73        | 9   | n.s.  |
| <i>Final Homing Phase</i>      |         |             |     |       |
| $\Delta h$                     | - 7°    | - 20°       | 1   | *     |
| Vector length r                | 0.99    | 0.98        | 4   | n.s.  |
| Steadiness                     | 0.87    | 0.85        | 7   | n.s.  |

$\Delta h$ , median deviation of the mean headings from the home direction; vector length r, median length of mean vectors based on the headings. T, test statistic of the Wilcoxon signed rank test; Sig.?, significance: n.s. not significant, \*  $p < 0.05$ .- Note that the Table does not reflect the number of Points of Decision, the efficiency and the behavior during the final homing phase realistically, as 19 of 54 experimental birds did not return while the battery was still operating, compared to 11 of 59 control birds.

Table 3. Short-term correlation dimensions

| Site | Dist. | First 2000 m |      |             |      | Central part of track |      |             |      | Last 2000 m |      |             |      |
|------|-------|--------------|------|-------------|------|-----------------------|------|-------------|------|-------------|------|-------------|------|
|      |       | Control      |      | Clock-shift |      | Control               |      | Clock-shift |      | Control     |      | Clock-shift |      |
|      |       | n            | mean | n           | mean | n                     | mean | n           | mean | n           | mean | n           | mean |
| BD   | 17.3  | 10           | 2.89 | 10          | 2.48 | 10                    | 3.02 | 10          | 2.98 | 10          | 3.36 | 8           | 3.10 |
| RB   | 19.2  | 4            | 2.48 | 4           | 2.04 | 4                     | 3.09 | 4           | 2.79 | 4           | 3.25 | 3           | 2.94 |
| BH   | 8.4   | 12           | 2.32 | 12          | 2.59 | 12                    | 2.99 | 11          | 2.94 | 11          | 3.05 | 11          | 2.92 |
| OT   | 17.9  | 10           | 2.47 | 9           | 2.21 | 10                    | 3.12 | 8           | 2.86 | 9           | 2.95 | 8           | 2.97 |
| WAL1 | 21.5  | 10           | 2.03 | 12          | 2.04 | 9                     | 3.09 | 11          | 2.67 | 8           | 3.12 | 5           | 2.96 |
| WAL2 | 21.5  | 9            | 2.32 | 10          | 2.17 | 8                     | 3.16 | 8           | 2.86 | 5           | 3.16 | 6           | 3.01 |
| Mean |       |              | 2.42 |             | 2.26 |                       | 3.08 |             | 2.85 |             | 3.15 |             | 2.98 |

Dist., distance of the release site from the loft in kilometers; n., number of tracks involved; mean, mean short time correlation dimension for the respective part of the tracks.

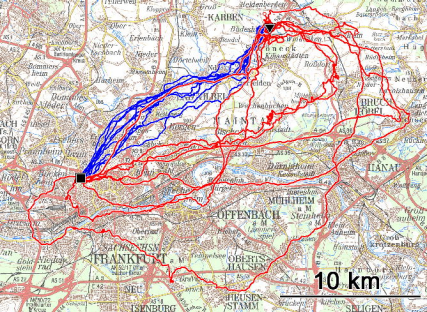

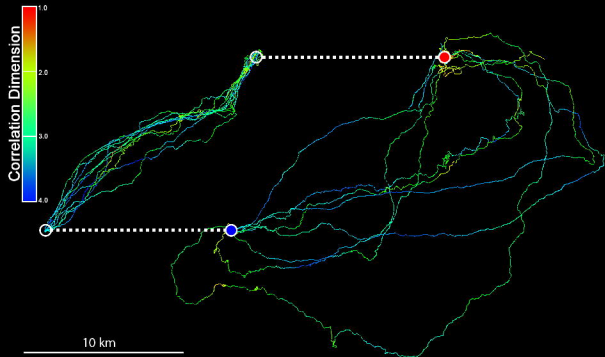

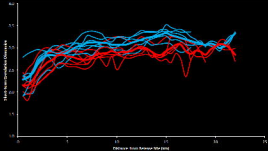

Source: https://cob.silverchair.com/jeb/article-pdf/doi/10.1242/jeb.104182/2037962/jeb_104182.pdf
